# Supplementary material
Source: Royal Society of Chemistry journal article supplement (doi:10.1039/d6cp01269h)
Supplement: d6cp01269h1.pdf [file d6cp01269h1.pdf]

## Supplementary Information

**Table S1. Full component SMILES library for hydrogen bond acceptors and donors**

| Molecule Name     | SMILES                                                                                           | Notes           |
|-------------------|--------------------------------------------------------------------------------------------------|-----------------|
| Choline Chloride  | <chem>C[N+](C)(C)CCO.[Cl-]</chem>                                                                | Ionic           |
| Betaine Chloride  | <chem>C[N+](C)(C)CC(=O)O.[Cl-]</chem>                                                            | Ionic           |
| Sodium Propionate | <chem>CCC(=O)[O-].[Na+]</chem>                                                                   | Ionic           |
| L-Proline         | <chem>OC(=O)[C@@H]1CCCN1</chem>                                                                  | Amino acid      |
| Betaine           | <chem>C[N+](C)(C)CC(=O)[O-]</chem>                                                               | Zwitterion      |
| Urea              | <chem>C(=O)(N)N</chem>                                                                           | Amide           |
| Glycerine         | <chem>C(C(CO)O)O</chem>                                                                          | Polyol          |
| Ethylene Glycol   | <chem>C(CO)O</chem>                                                                              | Diol            |
| 1,2-Butanediol    | <chem>CCC(CO)O</chem>                                                                            | Diol            |
| 1,3-Butanediol    | <chem>CC(CCO)O</chem>                                                                            | Diol            |
| 1,4-Butanediol    | <chem>C(CCO)CO</chem>                                                                            | Diol            |
| 2,3-Butanediol    | <chem>CC(C(C)O)O</chem>                                                                          | Diol            |
| 1,6-Hexanediol    | <chem>C(CCCO)CCO</chem>                                                                          | Diol            |
| Malic Acid        | <chem>C(C(C(=O)O)O)C(=O)O</chem>                                                                 | Carboxylic acid |
| Malonic Acid      | <chem>C(C(=O)O)C(=O)O</chem>                                                                     | Carboxylic acid |
| Citric Acid       | <chem>C(C(=O)O)C(CC(=O)O)(C(=O)O)O</chem>                                                        | Carboxylic acid |
| Levulinic Acid    | <chem>CC(=O)CCC(=O)O</chem>                                                                      | Keto acid       |
| Lactic Acid       | <chem>CC(C(=O)O)O</chem>                                                                         | Hydroxy acid    |
| Oxalic Acid       | <chem>C(=O)(C(=O)O)O</chem>                                                                      | Carboxylic acid |
| Fructose          | <chem>C1[C@H]([C@H]([C@@H](C(O1)(CO)O)O)O)O</chem>                                               | Sugar (Ketose)  |
| Glucose           | <chem>C([C@@H]1[C@H]([C@@H]([C@H](C(O1)O)O)O)O)O</chem>                                          | Sugar (Aldose)  |
| Sucrose           | <chem>C([C@@H]1[C@H]([C@@H]([C@H]([C@H](O1)O[C@]2([C@H]([C@@H]([C@H](O2)CO)O)O)CO)O)O)O)O</chem> | Disaccharide    |
| Sorbitol          | <chem>C([C@H]([C@H]([C@@H]([C@H](CO)O)O)O)O)O</chem>                                             | Sugar alcohol   |

---

|               |                                             |                                  |
|---------------|---------------------------------------------|----------------------------------|
| Menthol       | <chem>CC1CCC(C(C1)C(C)C)O</chem>            | Terpenoid                        |
| Thymol        | <chem>CC1=CC(=C(C=C1)C(C)C)O</chem>         | Phenolic                         |
| N4444Br       | <chem>CCCC[N+](CCCC)(CCCC)CCCC.[Br-]</chem> | Tetrabutylammonium bromide       |
| Lauric Acid   | <chem>CCCCCCCCCCCC(=O)O</chem>              | Fatty acid (C <sub>12</sub> )    |
| Dodecanol     | <chem>CCCCCCCCCCCCO</chem>                  | Fatty alcohol (C <sub>12</sub> ) |
| Octanoic Acid | <chem>CCCCCCCC(=O)O</chem>                  | Fatty acid (C <sub>8</sub> )     |

---

**Table S2. SMARTS patterns utilized for functional group recognition**

| <b>Group Name</b>              | <b>SMARTS Pattern</b> | <b>F<sub>di</sub></b> | <b>F<sub>pi</sub><sup>2</sup></b> | <b>E<sub>hi</sub></b> | <b>V<sub>mi</sub></b> |
|--------------------------------|-----------------------|-----------------------|-----------------------------------|-----------------------|-----------------------|
| Methyl (-CH <sub>3</sub> )     | [CX4H3]               | 420                   | 0                                 | 0                     | 33.5                  |
| Methylene (-CH <sub>2</sub> -) | [CX4H2]               | 270                   | 0                                 | 0                     | 16.1                  |
| Methine (>CH-)                 | [CX4H1]               | 80                    | 0                                 | 0                     | -1                    |
| Quaternary Carbon (>C<)        | [CX4H0]               | 70                    | 0                                 | 0                     | -19.2                 |
| Alkenyl (=CH-)                 | [CX3H1]               | 200                   | 0                                 | 0                     | 13.5                  |
| Alkenyl (>C=)                  | [CX3H0]               | 70                    | 0                                 | 0                     | -5.5                  |
| Carboxyl (-COOH)               | [CX3](=O)[OX2H1]      | 530                   | 420                               | 10000                 | 28.5                  |
| Ester (-COO-)                  | [CX3](=O)[OX2H0]      | 390                   | 490                               | 7000                  | 18                    |
| Alcohol (-OH)                  | [OX2H1;!\$(OC=O)]     | 210                   | 500                               | 20000                 | 10                    |
| Ether/Sugar (-O-)              | [OX2H0;!\$(OC=O)]     | 100                   | 400                               | 3000                  | 3.8                   |
| Ketone (>C=O)                  | [CX3H0](=O)           | 290                   | 770                               | 2000                  | 10.8                  |
| Aromatic Carbon                | [c]                   | 211.6                 | 18.3                              | 0                     | 8.7                   |
| Chloride (-Cl)                 | [Cl]                  | 450                   | 550                               | 400                   | 24                    |
| Amine (-NH <sub>2</sub> )      | [NX3H2]               | 280                   | 0                                 | 8400                  | 19.2                  |
| Amide (-NH-)                   | [NX3H1]               | 160                   | 210                               | 3100                  | 4.5                   |
| Tertiary Amine (>N-)           | [NX3H0]               | 20                    | 800                               | 5000                  | -9                    |

### **S3. Complete High-Throughput Screening (HTS) output dataset**

The complete High-Throughput Screening output dataset is open-source and freely accessible via GitHub at <https://github.com/iehoshva/early-screening-des>.
